# Supplementary material for: Facile Preparation of Monodisperse Cu@Ag Core–Shell Nanoparticles for Conductive Ink in Printing Electronics
Source: MDPI journal article supplement (doi:10.3390/mi14071318), 2023-06-27
Supplement: s1 [file s1]

## Supporting information for

# Facile preparation of monodisperse Cu@Ag core-shell nanoparticles for conductive ink in printing electronics

Gang Li <sup>1,2,3</sup>, Xuecheng Yu <sup>2</sup>, Ruoyu Zhang <sup>2</sup>, Qionglin Ouyang <sup>2</sup>, Rong Sun <sup>2</sup>, Liqiang Cao <sup>1\*</sup>, and Pengli Zhu <sup>3\*</sup>

<sup>1</sup> System Packaging and Integration Research Center, Institute of Microelectronics of Chinese Academy of Sciences, Beijing 100029, China

<sup>2</sup> Shenzhen Institute of Advanced Electronic Materials, Shenzhen Institutes of Advanced Technology, Chinese Academy of Sciences, Shenzhen 518055, China

<sup>3</sup> University of Chinese Academy of Sciences, Beijing 100049, China

\* Correspondence: caoliqiang@ime.ac.cn, pl.zhu@siat.ac.cn

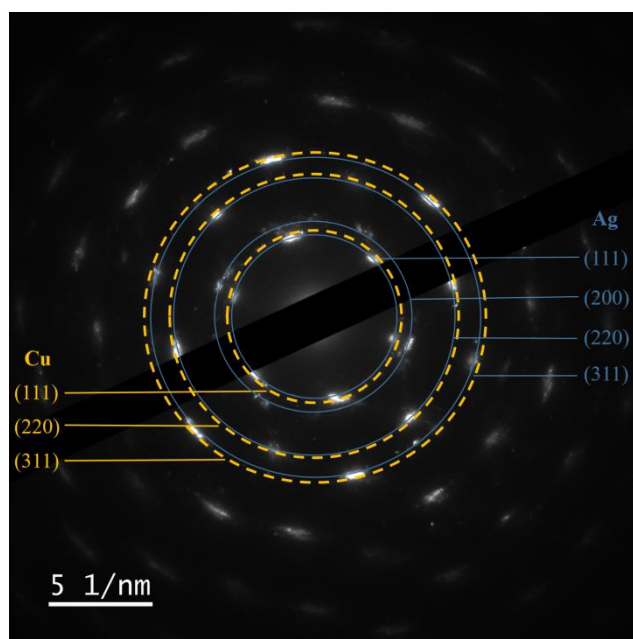

**Figure S1.** SAED pattern of Cu@Ag core-shell nanoparticles.

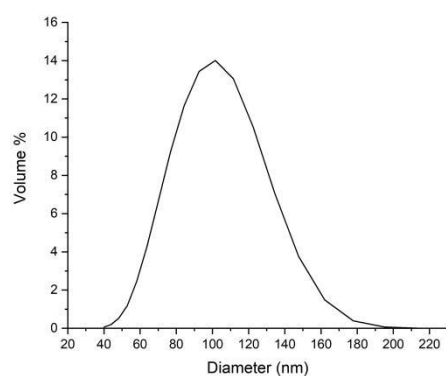

**Figure S2.** Size distribution of Cu@Ag nanoparticles according to DLS.

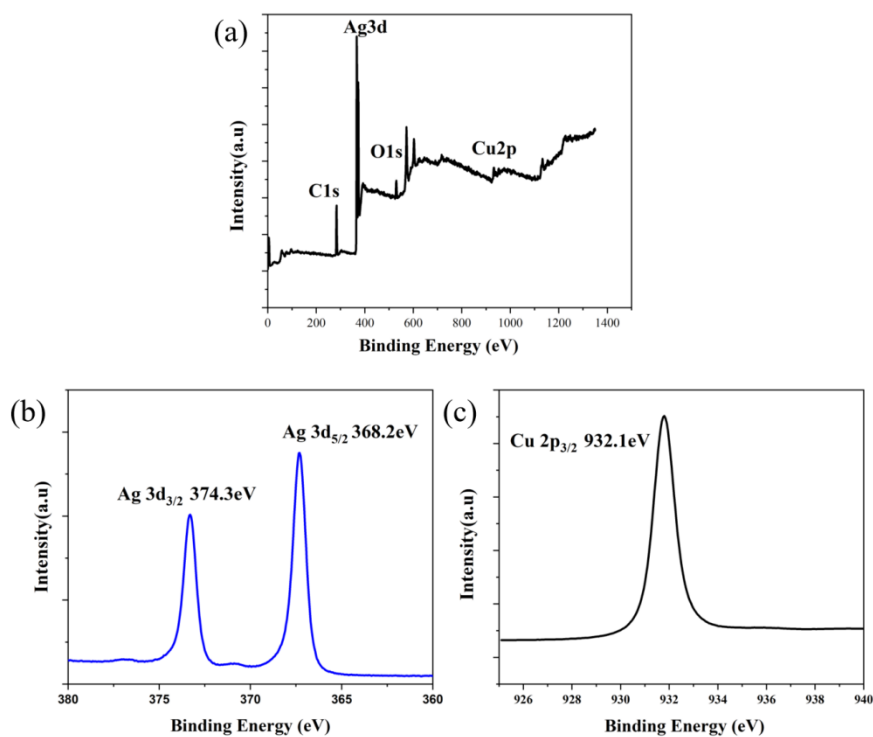

**Figure S3.** (a) survey spectra, (b) Ag 3d spectra, (c) Cu 2p<sub>3/2</sub> spectra.

XPS analysis was further conducted to characterize the element composition of the different valence states of Cu–Ag core–shell nanoparticle. Figure S3 clearly illustrates that the binding energies of Cu 2p<sub>3/2</sub>, Ag 3d<sub>5/2</sub> and Ag 3d<sub>3/2</sub> were 932.1 eV, 368.2 eV and 374.3 eV, respectively, demonstrating the presence of elementary Cu(0) and Ag(0).
